# Supplementary material
Source: HighWire-hosted journal article supplement (https://cmaj.ca/highwire/filestream/80281/field_highwire_adjunct_files/0/202893-image-1-at.pdf)
Supplement: 202893-image-1-at.pdf [file 202893-image-1-at.pdf]

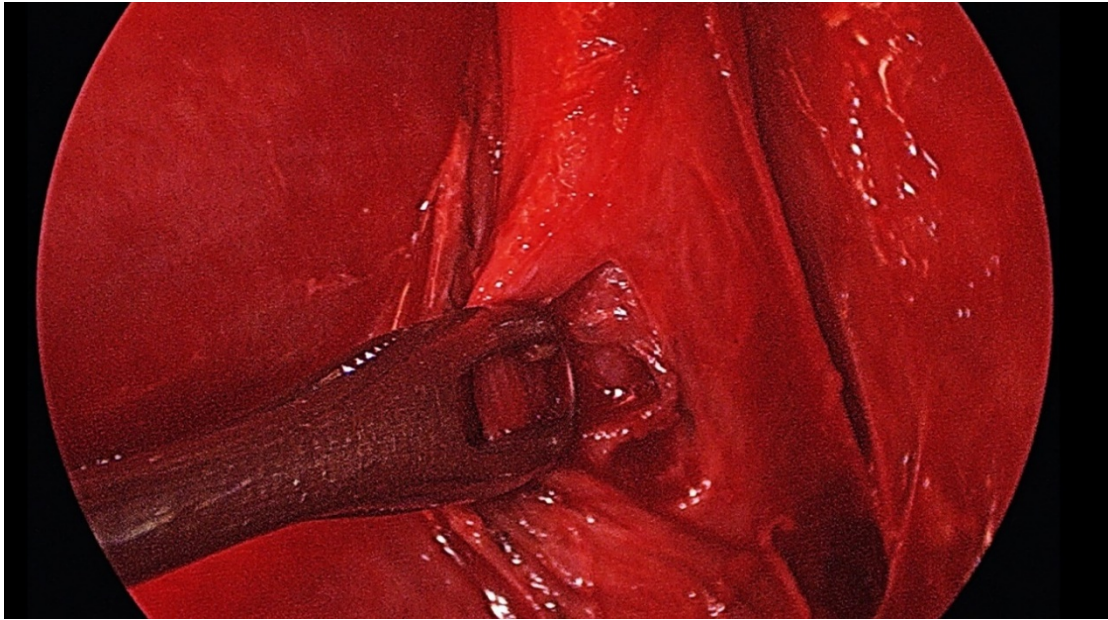

Appendix 1. A 1.5cm laceration was found at the lower thoracic esophagus without ulceration, decay, or gangrene formation during surgery.
